# Supplementary material
Source: Springer Nature journal article supplement (https://www.springermedizin.de/resource/supplementary/12911_2013_815_MOESM7_ESM.pdf/9526722)

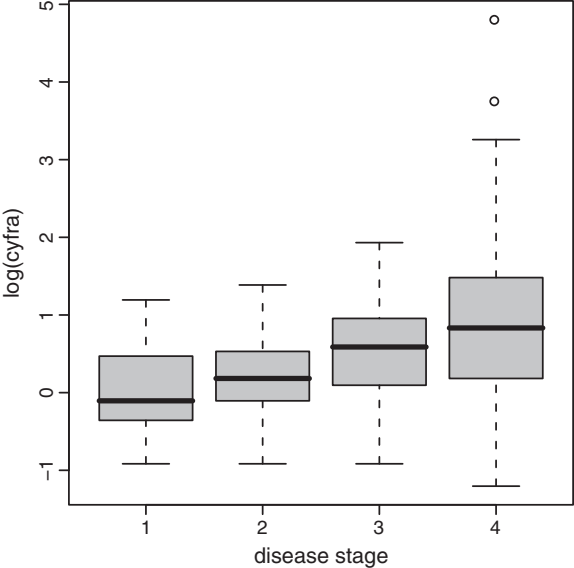

Supplement: MOESM7 [file 9526722]
